# Supplementary material for: Escherichia coli O157:H7 tir 255 T > A allele strains differ in chromosomal and plasmid composition
Source: Front Microbiol. 2023 Dec 15;14:1303387. doi: 10.3389/fmicb.2023.1303387 (PMC10758439; doi:10.3389/fmicb.2023.1303387)
Supplement: Supplementary file 4 [file Table_4.XLSX]

## Sheet: Sheet1
Supplemental Table 4. SNPs in linkage with the tir 255 T>A allele.
Nucleotide postion on the Sakai chromosome	Sequence of the SNP with 10 bp upsteam and 9 downstream (base to right of . is the SNP)	Nucleotide in tirT strains	Nucleotide in tirA strains	Gene length/intergenic region description	bp position in gene	Amino acid change	Transition - Transversion	synonymous - nonsynonymous	TX 376-2 annotated gene name	TX 376-2 gene locus ID
30737	GTGTCGAGCA.GGTTAACCAG	G	A	1590	256	L	transition	synonymous	prfC CDS	E4U64_24350
37706	TCCGCCAGCT.GCTGGCACAA	G	A	771	525	L	transition	synonymous	threonine/serine exporter ThrE family protein CDS	E4U64_24400
95408	GGCGTCAGGG.TCGTCCACGA	T	G	531	412	T>P	transversion	nonsynonymous	fimF CDS	E4U64_24655
96152	ACCGCGTTAT.CTAAATCGAC	C	T	2637	2314	D>N	transition	nonsynonymous	fimbrial biogenesis outer membrane usher protein CDS	E4U64_24660
179388	CGCAACGATG.GGCGTGATGC	G	A	1656	1184	G>E	transition	nonsynonymous	treC CDS	E4U64_25005
203802	GTTCGAAACC.GGTCAGCGAG	G	A	555	76	G>S	transition	nonsynonymous	YtfJ family protein CDS	E4U64_25110
206817	TGCGCTGGCA.GGAGCGAAAT	G	A	1944	395	R>G	transition	nonsynonymous	cpdB CDS	E4U64_25125
243974	CAAACTCCTG.GAGGTCTTCC	G	C	1281	81	L	transversion	synonymous	hflX CDS	E4U64_25340
323344	TGGCAAACGG.CGAAGCGCCG	C	T	1065	411	G	transition	synonymous	phnI CDS	E4U64_25735
325139	GGTCTCGGCA.GGCGGCAATA	G	A	759	307	S>G	transition	nonsynonymous	phnK CDS	E4U64_25745
329881	TTGCGGGCCG.CATTGACCAC	C	T	2271	2119	T>A	transition	nonsynonymous	hybrid sensor histidine kinase/response regulator CDS	E4U64_25746
403743	GCTGATGTTT.GGCGTGGGCG	G	A	1476	820	G>S	transition	nonsynonymous	xylE CDS	E4U64_26200
407980	AATTTGCTGG.CGTAAGGCGT	C	T	738	302	R>H	transition	nonsynonymous	hypothetical protein CDS	E4U64_26220
458930	TACCGATACC.GACAACGATA	G	A	1230	634	D>N	transition	nonsynonymous	L-sorbose 1-phosphate reductase CDS	E4U64_26290
469218	TTGCCCAGCC.TGGCCCAGGA	T	A	2187	1655	L>Q	transversion	nonsynonymous	ShET2/EspL2 family type III secretion system effector toxin CDS	E4U64_26315
550381	TGAGCCAGGG.GAAGCCGTAG	G	A	2502	1033	E>K	transition	nonsynonymous	ptsP CDS	E4U64_26665
556779	TCGGCGTCTG.GGTCCAGACC	G	A	2181	957	T	transition	synonymous	katG CDS	E4U64_26690
622960	GGTGATTCAT.TACTCATTAG	T	C	894	73	N>D	transition	nonsynonymous	hypothetical protein CDS	E4U64_27005
635353	GGCAAGCCGC.CGGTCTTTTA	C	A	2037	1976	P>Q	transversion	nonsynonymous	yihQ CDS	E4U64_27065
638172	TGCTGCATTG.ACGATGGGAT	A	G	1404	1285	T>A	transition	nonsynonymous	permease CDS	E4U64_27075
658683	TTAATACCTG.CGTTGATAAA	C	T	627	400	A>T	transition	nonsynonymous	dsbA CDS	E4U64_27160
735885	TATACGCCAG.CGCGATTAAC	C	A	1050	135	A	transversion	synonymous	wzzE CDS	E4U64_27560
749793	TCGGCGTCCA.GGCTTTGTCA	G	A	1851	1737	A	transition	synonymous	ilvD CDS	E4U64_27625
764339	CGGCATTTAA.AGCTTGTCAG	A	G	693	657	K	transition	synonymous	FadR family transcriptional regulator CDS	E4U64_27700
807035	AAGATTTTCA.ACTCAATGAT	A	G	2262	1617	Q	transition	synonymous	type III effector protein CDS	E4U64_00140
839489	AACGCGTGAG.CGCACCGAGC	C	T	333	254	R>H	transition	nonsynonymous	YceK/YidQ family lipoprotein CDS	E4U64_00290
883317	ACGCACCAAC.TGCATCCCAT	T	G	459	336	A	transversion	synonymous	etgA CDS	E4U64_00540
a897102	CACTGAATGA.TGGATTTGAA	T	A	1695	225	D>E	transversion	nonsynonymous	tir CDS	E4U64_00630
937449	CAGACGCTGC.TCGATCAATG	T	A	864	470	E>V	transversion	nonsynonymous	YicC family protein CDS	E4U64_00825
983762	TTAGCACTGG.AATCGTCAAA	A	G	1914	1465	S>P	transition	nonsynonymous	PTS mannitol transporter subunit IICBA CDS	E4U64_01060
989711	GATACTGCGC.GTTGCGGATT	G	T	4230	3860	T>K	transversion	nonsynonymous	RHS repeat protein CDS	E4U64_01095
1007541	TCCGGGTGAC.CAGGATAACC	C	T	1971	553	G>S	transition	nonsynonymous	glycoside hydrolase family 127 protein CDS	E4U64_01155
1026730	AACGTTATAA.CACCGGCGAG	C	T	300	159	N	transition	synonymous	hypothetical protein CDS	E4U64_01240
1056693	CCAACGGGGA.CGTCGGTGAT	C	T	1680	1402	V>I	transition	nonsynonymous	bcsG CDS	E4U64_01385
1106111	ACCAACCACG.CGTTCGCCAG	C	A	915	215	R>L	transversion	nonsynonymous	hemin ABC transporter substrate-binding protein CDS	E4U64_01575
1128922	TATTGTAAAA.CGTATTAACG	C	T	1053	309	T	transition	synonymous	DUF2776 domain-containing protein CDS	E4U64_01680
1128979	TGAATAATGC.CAGGCATATG	C	T	1053	252	L	transition	synonymous	DUF2776 domain-containing protein CDS	E4U64_01680
1153360	AGGAATTGGA.CAGGATCACC	C	T	1170	1110	L	transition	synonymous	beta-ketoacyl-[acyl-carrier-protein] synthase family protein CDS	E4U64_01805
1196612	TTTAAAGGGG.TAGGTTTTAA	T	G	912	748	T>P	transversion	nonsynonymous	DUF4225 domain-containing protein CDS	E4U64_02040
1198577	AAGTGCTAAA.CGATCCCGAT	C	T	1038	186	N	transition	synonymous	oxidoreductase CDS	E4U64_02050
1209702	GCGCATAACG.GTCAGCTCTA	G	C	2187	554	G>A	transversion	nonsynonymous	glgB CDS	E4U64_02105
1405010	GGGATACCCA.GGATGATGAG	G	A	2337	1938	Q	transition	synonymous	arcB CDS	E4U64_03100
1413217	ATCACCAGAA.CCGCCAGTGA	C	A	576	46	V>F	transversion	nonsynonymous	lptC CDS	E4U64_03155
1422299	TGATTGATCA.GTTGGACGTC	G	A	972	91	L	transition	synonymous	octaprenyl-diphosphate synthase CDS	E4U64_03215
1452697	AGGCGTCGAG.CATCGCGAAA	C	T	879	786	M>I	transition	nonsynonymous	U32 family peptidase CDS	E4U64_03360
1456484	AGGCGTAACG.CCTCGCGGTT	C	T	519	538	A>T	transition	nonsynonymous	yhbO CDS	E4U64_03390
1471621	ATTGTGCTTT.GAACATCACG	G	A	804	606	F	transition	synonymous	N-acetylgalactosamine permease IIC component 1 CDS	E4U64_03470
1519337	ACGTCATCAC.CAGGATGCCA	C	T	966	903	L	transition	synonymous	alx CDS	E4U64_03720
1538929	TGCCGCGCGG.CGACTGATAA	C	T	1491	609	S	transition	synonymous	ygjG CDS	E4U64_03795
1553462	CGGAGTATGC.ACAAAGCGCC	A	T	933	798	A	transversion	synonymous	ttdR CDS	E4U64_03860
1579233	ACCGGTATGA.CGAGGAACAT	C	T	2142	1826	R>H	transition	nonsynonymous	TonB-dependent siderophore receptor CDS	E4U64_03990
1607139	TAACCGAAGG.CAAGAAAGAC	C	T	426	288	G	transition	synonymous	exbD CDS	E4U64_04115
1617667	TTGAAGAGGG.CCAACGCCTG	C	G	489	369	G	transversion	synonymous	hybE CDS	E4U64_04170
1619978	TGTCGCCATC.ATTACCCAAT	A	G	1860	403	I>V	transition	nonsynonymous	bifunctional glutathionylspermidine amidase/synthase CDS	E4U64_04190
1657621	GGAACGCCCG.CGTCTGGCTG	C	A	1008	329	A>E	transversion	nonsynonymous	mutY CDS	E4U64_04395
1752858	CGCCGCTGAT.ATCAGCTGGC	A	G	1188	1002	D	transition	synonymous	ygeW CDS	E4U64_04865
1774554	TCTAAAAAAG.GGCAAATTCT	G	A	1122	59	G>E	transition	nonsynonymous	EscU/YscU/HrcU family type III secretion system export apparatus switch protein CDS	E4U64_04970
1796098	GTCGCTTTTA.TGCTGTCGTA	T	A	693	683	M>K	transversion	nonsynonymous	aspartate/glutamate racemase CDS	E4U64_05110
1839479	CGACAAAGGG.TTCGCGCACG	T	G	1776	990	E>D	transversion	nonsynonymous	fucI CDS	E4U64_05305
1847413	TCGCACGCGG.CGGTGGTGTC	C	T	1290	411	P	transition	synonymous	HAAAP family serine/threonine permease CDS	E4U64_05335
1952148	AAGGTTATGG.ACCTGCGCGT	A	T	501	264	G	transversion	synonymous	recX CDS	E4U64_05840
1954358	CGAAGACCTG.GTGAACGCAC	G	A	2631	1846	V>M	transition	nonsynonymous	alaS CDS	E4U64_05845
1958574	GCGATCTCGG.CTATACCAAT	C	T	1557	720	G	transition	synonymous	gshA CDS	E4U64_05890
1959186	ATAATCCCGA.TCTGACTTTC	T	G	1557	1332	D>E	transversion	nonsynonymous	gshA CDS	E4U64_05890
2025231	GCCGACAACT.GCCGCTGTTG	G	A	1662	1412	A>V	transition	nonsynonymous	recN CDS	E4U64_06275
2030135	GATGGGTGAT.GTATTCATTG	G	A	792	342	Y	transition	synonymous	inner membrane protein YpjD CDS	E4U64_06300
2052698	TACAAACAGC.AGGTGTTTTT	A	G	1299	198	A	transition	synonymous	kgtP CDS	E4U64_06415
2089033	CGCTGCAACT.GCAACTGGCG	G	A	714	462	L	transition	synonymous	qseG CDS	E4U64_06585
2093152	ACAGCATCGG.CGCTTACCTG	C	T	1254	582	G	transition	synonymous	serine hydroxymethyltransferase CDS	E4U64_06605
2122952	TACTGGAATC.CACCGTCTGG	C	T	777	96	S	transition	synonymous	sseB CDS	E4U64_06750
2187009	CCCCGCGACC.GGCGCACCAC	G	A	2016	520	G>S	transition	nonsynonymous	tRNA(Met) cytidine acetyltransferase CDS	E4U64_07010
2190207	CCACATCACC.TACCACTTCG	T	C	1128	507	V	transition	synonymous	dapE CDS	E4U64_07025
2210217	GCAGTCGTCA.CTGGACAAAT	C	T	288	20	T>I	transition	nonsynonymous	eutN CDS	E4U64_07115
2214976	GCGGCAGCCG.GCATGGTGGC	G	A	1227	953	G>D	transition	nonsynonymous	eutH CDS	E4U64_07135
2271147	ATCGATCCCC.AACGCGGTAG	A	C	1698	494	L>W	transversion	nonsynonymous	sensor histidine kinase CDS	E4U64_07440
2293230	TAAAATGCCC.GGATTGTGCA	G	A	1434	792	S	transition	synonymous	glycoside hydrolase family 32 protein CDS	E4U64_07530
2317335	TGGCAAAAAA.CCTGCAATGG	C	A	2640	342	N>K	transversion	nonsynonymous	fimbrial biogenesis outer membrane usher protein CDS	E4U64_07645
2360646	TGGGGCTTGC.GCCGCAGGAG	G	A	651	462	A	transition	synonymous	hxpA CDS	E4U64_07865
2364012	GTCCATTAAA.GGTAATGGTC	G	A	1218	702	T	transition	synonymous	pyridoxal phosphate-dependent aminotransferase CDS	E4U64_07880
2387338	ATTTGTCGCA.AGAGATTCCG	A	T	1296	51	Q>H	transversion	nonsynonymous	menF CDS	E4U64_07985
2429387	AGTGAAGTTA.CCTTTGATAT	C	T	3753	896	T>I	transition	nonsynonymous	yfaL CDS	E4U64_08160
2466885	GGCGTCCGTG.CGACCTGTCC	C	T	603	254	A>V	transition	nonsynonymous	napC CDS	E4U64_08280
2480028	GTATCGATTT.AACCGAATGG	A	T	1008	462	L>F	transversion	nonsynonymous	yejK CDS	E4U64_08350
2489682	ACTGGGCCAC.GGCATCGCCC	G	T	1815	1469	P>Q	transversion	nonsynonymous	ABC transporter substrate-binding protein CDS	E4U64_08395
2508898	ATGGGCCTCG.ATCTCACCAA	A	C	942	569	D>A	transversion	nonsynonymous	rihB CDS	E4U64_08475
2526692	CACTGAAGTA.CGCGCGTAAG	C	T	1011	996	Y	transition	synonymous	mglC CDS	E4U64_08550
2546210	TTTTCATGCG.CGGCGGTAAA	C	A	1716	1137	P	transversion	synonymous	D-lactate dehydrogenase CDS	E4U64_08655
2631026	GTGTTGCCCA.GGATTAAATA	G	A	543	537	Q	transition	synonymous	type 1 fimbrial protein CDS	E4U64_09155
2650906	GGCGTCGCAA.ATTGCGCTGG	A	G	1256	283	I>V	transition	nonsynonymous	galactitol permease IIC component CDS	E4U64_09270
2658360	TGCAACGGCG.CAAAATGGTT	C	T	723	375	L	transition	synonymous	baeR CDS	E4U64_09310
2660492	AACGTAGTAC.CAGCCCAACA	C	G	1416	1055	W>S	transversion	nonsynonymous	MFS transporter CDS	E4U64_09320
2683882	ATCTCTTCCA.CTTCGTTCGG	C	A	1584	1285	V>L	transversion	nonsynonymous	TerC family protein CDS	E4U64_09410
2697439	GCGGGTTATT.ACCGCACCGC	A	T	1224	115	T>S	transversion	nonsynonymous	wcaI CDS	E4U64_09475
2705716	ATTGCCATCA.ACTATGAACA	A	G	1281	1058	N>S	transition	nonsynonymous	wcaK CSS	E4U64_09500
2709690	CCAAAAAAGA.CGACATAACG	C	T	996	972	D	transition	synonymous	N-acetyl-alpha-D-glucosaminyl-diphospho-ditrans,octacis-undecaprenol 4-epimerase CDS	E4U64_09515
2736919	AGATGGTGTC.GAAGCGGCCC	G	A	825	112	E>K	transition	nonsynonymous	SDR family oxidoreductase CDS	E4U64_09655
2966144	GATGCCTCAC.ACGCGGCCTG	A	G	291	281	H>R	transition	nonsynonymous	yebG CDS	E4U64_11495
3020992	GGCCAATAAT.GGCAGGGTGG	G	T	1182	173	P>Q	transversion	nonsynonymous	nimT CDS	E4U64_11795
3045717	ATTCACGCCA.CGACAACCAT	C	T	642	536	R>H	transition	nonsynonymous	pncA CDS	E4U64_11920
3051848	TGCTGGCGGT.CATGCCGGAA	C	T	1044	927	V	transition	synonymous	selD CDS	E4U64_11945
3136372	CGGGCGAGAA.GATTATGAAG	G	T	747	154	D>Y	transversion	nonsynonymous	sufC CDS	E4U64_12365
3144034	GCTTTGTAAT.TTTAATTGAT	T	C	1596	534	A	transition	synonymous	acetate CoA-transferase YdiF CDS	E4U64_12300
3223776	GACAATAATT.GTTAACGGCA	G	C	1035	953	T>R	transversion	nonsynonymous	tqsA CDS	E4U64_12780
3403000	GCACTGCGCG.CAGCGTTAAA	C	T	2796	1005	R	transition	synonymous	insulinase family protein CDS	E4U64_14235
3429253	CAGCTAATGC.GCTGCCATTT	G	A	3048	367	R>C	transition	nonsynonymous	fdnG CDS (TonB-dependent receptor CDS)	E4U64_14335
3481339	AATTGAAAAC.CATGTGGAGT	C	T	981	856	H>Y	transition	nonsynonymous	LbetaH domain-containing protein CDS	E4U64_14575
3483688	GAAAGTGAAT.TTCACGCGCC	T	A	1656	390	E>D	transversion	nonsynonymous	glucan biosynthesis protein D CDS	E4U64_14590
3485602	CATTGCCTGC.GAAAACTGTT	G	A	1344	44	S>L	transition	nonsynonymous	VOC family protein CDS	E4U64_14595
3591418	TTCCAGAAAA.GCGGTATGCT	G	A	753	662	S>N	transition	nonsynonymous	fnr CDS	E4U64_14815
3619392	GGTTCAGCCC.GATGCCATCG	G	A	1305	1019	I	transition	synonymous	sugar phosphorylase CDS	E4U64_14950
3651078	AAGCAGCGAT.GTTTTGCGCT	G	A	1986	85	V>I	transition	nonsynonymous	pdeR CDS	E4U64_15100
3670140	TGGTTTCTGG.CGGCAACTCC	C	A	873	741	P	transversion	synonymous	rluB CDS - 23S rRNA pseudouridylate synthase B	E4U64_15200
3676402	ATGTTTGCCG.GATTAACAAA	G	C	1596	365	G>A	transversion	nonsynonymous	trpD CDS	E4U64_15230
3678237	TACCCGCGAG.CTTGCGCCGA	C	A	1362	604	L>I	transversion	nonsynonymous	trpCF CDS	E4U64_15235
3836859	TCGGCTCCTT.CCCGAATGGA	C	T	954	549	F	transversion	synonymous	ompT CDS	E4U64_16025
3878972	GGCCCCACCC.GCTATAAAAG	G	A	237	112	A>T	transition	nonsynonymous	excisionase CDS	E4U64_16310
4004327	CGACATCTTT.GCTGTTGTTG	G	A	783	276	S	transition	synonymous	flagellar basal body rod protein FlgG CDS	E4U64_17070
4007430	GGTGGTTACC.GCAATGGACA	G	A	696	11	A>V	transition	nonsynonymous	flgD CDS	E4U64_17085
4265397	CATCCTCAAC.GATATTCTCG	G	A	2745	1492	D>N	transition	nonsynonymous	torS CDS	E4U64_17110
4270530	TGGGTCGATT.CGGCTACTGG	C	T	645	557	S>L	transition	nonsynonymous	YjbF family lipoprotein CDS (clpA CDS)	E4U64_18150
4276937	TGATTACTCG.CGGTCAGGTG	C	T	2181	1842	R	transition	synonymous	tyrosine-protein kinase CDS	E4U64_18175
4340958	CGACTTTTTC.CGGAACGTCT	C	T	414	204	P	transition	synonymous	CoA-binding protein CDS	E4U64_18625
4466006	GGGTACGCTC.CGTCAGTCCA	C	A	516	493	R>S	transversion	nonsynonymous	lipoprotein CDS	E4U64_19215
4529637	CTTTGCGGAG.CATTCGCTGG	C	T	2226	991	H>Y	transition	nonsynonymous	ybiO CDS	E4U64_19530
4547637	GACGCCTGGC.GGGCAAGCTC	G	A	1737	408	A	transition	synonymous	ABC transporter ATP-binding protein CDS	E4U64_19600
4567171	GTCGCAAATT.GATGCCATGT	G	A	1290	217	D>N	transition	nonsynonymous	bioA CDS	E4U64_19700
4614150	AATTATCAAG.TATGAAGGCA	T	C	954	21	S	transition	synonymous	LysR family transcriptional regulator CDS	E4U64_20030
4615845	AAACTGCCCC.TGGTGATCGG	T	A	996	275	Q>L	transversion	nonsynonymous	6-phosphogluconolactonase CDS	E4U64_20035
4644648	AATCTCAGCG.ATCAAAAATT	A	C	423	203	D>A	transversion	nonsynonymous	hypothetical protein CDS	E4U64_20215
4648256	AAGTCCGCAC.GAAGCCTGGG	G	A	1446	985	E>K	transition	nonsynonymous	methylaspartate mutase subunit E CDS	E4U64_20230
4650056	GAATCGCCCG.ATCTGATCGC	A	C	1371	95	D>A	transversion	nonsynonymous	acyclic terpene utilization AtuA family protein CDS	E4U64_20240
4651073	GGGCATGAGC.TGGGGATTGT	T	A	1371	1112	L>Q	transversion	nonsynonymous	acyclic terpene utilization AtuA family protein CDS	E4U64_20240
4655428	TTTGATAACG.GCATTCAGGC	G	T	603	572	G>V	transversion	nonsynonymous	cobO CDS	E4U64_20260
4675837	AGTTAACAAC.GCCTTACCAC	G	C	792	161	A>G	transversion	nonsynonymous	endonuclease VIII CDS	E4U64_20355
4706256	TTTTGTTGAC.GGGGAGTGGC	G	T	765	505	G>W	transversion	nonsynonymous	esterase CDS	E4U64_20490
4748873	GGTCGCTGTC.GGCGCTTACC	G	A	468	369	S	transition	synonymous	rlmH CDS	E4U64_20725
4805357	ATCGCCAGAA.CTACTCGCTG	C	T	2241	930	N	transition	synonymous	fepA CDS	E4U64_20985
4837239	ACTTACGCGA.CCGCGCTGGC	C	G	2973	773	T>S	transversion	nonsynonymous	phage receptor CDS	E4U64_21120
4887705	CTGCTTCGGC.GTCGCGCCAA	G	A	780	494	T>M	transition	nonsynonymous	fetB CDS	E4U64_21340
4904520	TAATTGCTTG.CGTTGAGCGC	C	T	20160	12706	A>T	transition	nonsynonymous	Ig-like domain-containing protein CDS	E4U64_21395
4929552	AGACGGAATG.CATCACGCCA	C	T	1677	4	H>Y	transition	nonsynonymous	Kef family K(+) transporter CDS	E4U64_21450
4932221	CGACCAATCG.GGCCATCCAC	G	A	1305	442	P>S	transition	nonsynonymous	inosine/guanosine kinase CDS	E4U64_21455
4949735	GGCGTTATCT.GGTGCTGTAT	G	A	3150	1626	L	transition	synonymous	multidrug efflux RND transporter permease subunit CDS	E4U64_21530
4953960	TTGCTGCCTG.TCGGCTTAAG	T	C	1557	71	V>A	transition	nonsynonymous	pdeB CDS	E4U64_21555
5002327	AAACATTACT.GGCAGCCGGT	G	A	885	18	L	transition	synonymous	nucleoside-specific channel-forming protein Tsx CDS	E4U64_21790
5038545	TGAGCAAGGG.ATCAAAGGTC	A	T	1095	670	I>F	transversion	nonsynonymous	ddlA CDS	E4U64_21955
5047260	GCCTGAGAGG.TGATAGCCAG	T	C	2943	64	T>A	transition	nonsynonymous	autotransporter outer membrane beta-barrel domain-containing protein CDS	E4U64_21990
5081124	TGTACTGCGC.GCTGGCACCA	G	T	1155	714	S>R	transversion	nonsynonymous	cynX CDS	E4U64_22140
5097396	CGGGTGATCA.GGGTAATCCA	G	A	816	311	P>L	transition	nonsynonymous	hypothetical protein CDS	E4U64_22210
5112885	CCGACCTGCT.GAATGATTTT	G	T	932	228	L	transversion	synonymous	LysR family transcriptional regulator CDS	E4U64_22285
5114224	ATAAGACCGG.ATGACTCCGC	A	C	1089	496	S>A	transversion	nonsynonymous	EAL domain-containing protein CDS	E4U64_22290
5114330	TCTGCGCGCA.GAAAACCGGT	G	A	1089	390	F	transition	synonymous	EAL domain-containing protein CDS	E4U64_22290
5118134	TAATAGTAGG.CGCAGAAATT	C	T	3984	711	A	transition	synonymous	autotransporter outer membrane beta-barrel domain-containing protein CDS	E4U64_22295
5124096	CGGCGACGGC.CCGGTGAGCG	C	A	1689	430	P>T	transversion	nonsynonymous	betA CDS	E4U64_22315
5213440	TCTTGTTGTA.GGCATAAAAA	G	A	774	486	A	transition	synonymous	peptidoglycan endopeptidase CDS	E4U64_22945
5231032	TGCCAGAGCG.CGCTTAGCGG	C	T	4224	469	A>T	transition	nonsynonymous	RHS repeat protein CDS	E4U64_23005
5236515	GCGCAATGGC.GCACGCACCG	G	A	1392	564	A	transition	synonymous	tssC CDS	E4U64_23030
5243423	TCACGCCTGC.CCTGCCCGCT	C	T	1332	848	P>L	transition	nonsynonymous	tssK CDS	E4U64_23060
5291729	TTTCGTACCA.GGCTTCGCAG	G	A	1149	159	A	transition	synonymous	lpxB CDS	E4U64_23300
5377527	TGGTGAAAAG.GTGGTATTAA	G	A	1386	538	V>M	transition	nonsynonymous	gspE CDS	E4U64_23670
5396097	TGCCCGGAAA.GTTTCATTTC	G	A	1317	790	L>F	transition	nonsynonymous	murD CDS	E4U64_23755
5427384	TTGTGCACAC.GCACTCGCGC	G	A	696	288	T	transition	synonymous	araD CDS	E4U64_23895
5447335	CATACACCGC.AAAGGCCATC	A	T	1332	1023	F>L	transversion	nonsynonymous	MFS transporter CDS	E4U64_23985
5447702	AGCCACCGGT.TCGCCAAACA	T	C	1332	656	E>G	transition	nonsynonymous	MFS transporter CDS	E4U64_23985
5472245	CATCCGCAAG.GGCCTGACGC	G	A	942	516	A	transition	synonymous	ribF CDS	E4U64_24085
808016	CCGAGTGAAT.GGTGCATTTT	G	A	23	23	W>stop	transition	truncated	hypothetical protein CDS	E4U64_00145
1045746	AGGAACGCAG.CAAGTTCCCA	C	T	376	376	Q>stop	transition	truncated	lpfE CDS	E4U64_01330
1780795	TCGGACATTA.TCCCGATTTA	T	G	78	78	Y>stop	transversion	truncated	response regulator transcription factor CDS	E4U64_05025
2215802	AACCGACAGC.CAGGGGCGCG	C	T	558	556	Q>stop	transition	truncated	eutA CDS	E4U64_07140
2418916	TATGTTGATT.GAGGAGACAT	G	T	1077	856	E>stop	transversion	truncated	glpQ CDS	E4U64_08120
4452044	TGCCATCTTC.CAGGGCGGCT	C	T	696	589	Q>stop	transition	truncated	aqpZ CDS	E4U64_19145
4838436	TACGCCTTGT.GGGATAGCGG	G	A	2973	1970	W>stop	transition	truncated	phage receptor CDS	E4U64_21120
409379	GAATTAGAGA.TGGGGTTTTA	T	C	Intergenic region			transition		Non-coding
859146	AGCGGCCTGC.TCGATAATTA	T	C	Intergenic region			transition		hypothetical protein CDS (Non-coding)	E4U64_00395
895064	TTAGATAATA.CAGGCTGAAT	C	T	Intergenic region between two genes pointed at one another			transition		Non-coding
1000567	ATTTCGCCAG.CCACGTCTAC	C	T	107 bp intergenic region upstream of aldehyde dehydrogenase B, SNP is 43 bp upstream of start codon.			transition		Non-coding
1040119	GAAATCCTCC.TTTTTTATTG	T	C	342 bp intergenic region upstream of lpfA, SNP 205 or 217 bp upstream of start codon depending upon which ATG site is used.			transition		Non-coding
1081641	AAAAGGGGAT.AATGTTTAGG	A	G	411 bp intergenic region upstream of MFS transporter, 111 bp upstream of ATG start codon.			transition		Non-coding
1087101	TTCTGGGTCA.CAATAACTCA	C	T	404 bp intergenic region upstream of cytochrome C peroxidase, 29 bp upstream of ATG start codon.			transition		Non-coding
1118508	TGTTTTACCA.CATTGATGTA	C	T	Intergenic region			transition		23S rRNA (adenine(2030)-N(6))-methyltransferase RlmJ CDS	E4U64_01635
1118595	GTACGCTCGG.CATGTTCGCT	C	T	Intergenic region			transition		23S rRNA (adenine(2030)-N(6))-methyltransferase RlmJ CDS	E4U64_01635
1475066	TCAATGGAGA.AAAAGGAAAT	A	G	350 bp intergenic region upstream of AgaS family sugar isomerase, 131 bp upstream of ATG start codon			transition		Non-coding
1520440	AAGTTACTCC.CCTTTGCAGG	C	T	283 bp intergenic region upstream of alx (transport protein), 201 bp upstream of ATG start codon			transition		Non-coding
1695820	ATGTCGCCGA.AGAAACCGTA	A	G	Intergenic region			transition		In the scpC CDS after a stop mutation	E4U64_04605
1788958	GCAATTTTGA.ACCATTCACA	A	G	399 or 459 bp intergenic region depending upon start codon, 383 or 443 bp upstream of TTG or ATG start codon, respectively.			transition		Non-coding
1806488	TGATTTATAT.TGCTTTTTAG	T	C	684 bp intergenic region upstream of DNA mismatch repair protein, tirA has an annotated hypothetical gene in the intergeinic region 98 bp upstream of ATG start codon			transition		Non-coding
1851386	GAAATAAGCG.AATACTTAAA	A	T	210 bp intergenic region upstream of csrB RNA, 141 bp upstream of CTC start.			transversion		Non-coding
2159295	GGGACACTGC.CTGGATATTA	C	T	170 bp intergenic region upstream of polyphosphate kinase (ppk1), 37 bp upstream of ATG start codon.			transition		Non-coding
2249156	TACATTGAGG.AATCAGGCGG	A	T	258 bp intergenic gerion upstream of gltX, 87 bp upstream of ATG start codon; tirA has an A insertion 5 bp upstream of SNP.			transversion		Non-coding
2647650	TTAAAAACAA.ATGATTTCAT	A	G	298 bp intergenic region upstream of gatY, 48 bp upstream of ATG start codon			transition		Non-coding (#N/A)
2759164	ATATATCTAT.AATTATTGTC	A	G	phage intergenic region, 77 bp upstream of TonB-dependent receptor			transition		Non-coding (#N/A)
2840018	TATAATTCAG.AATTATGAAT	A	G	548 or 570 bp depending upon start codon for opposite gene, 196 bp upstream of porin (outer memberane protein). 4 bp insertion 439 bp upstream of start codon			transition		Non-coding (heavy metal sensor histidine kinase CDS)
2840042	AATATAAATA.TTCATGAAAA	T	C	Same as above except SNP is 172 bp from ATG start codon.			transition		Non-coding
3231386	TTATTTTCCT.GGTTTATATT	G	A	124 bp intergentic region upstream of bioD, 36 kb upstread of ATG start codon			transition		Non-coding
3741805	GCCCACGCCT.GAAGGCCAGC	G	T	tirA has a protein annoated 27 upstream of start for UPF0259 family protein. SNP is 12 bp upstream of this annotation. 129 bp upstream of UPF0259 (hypotetical protein) ATG start codon.			transversion		Non-coding
3773549	TAAATTAAGA.CGTTTTATAC	C	T	392 bp intergenic region upstream of nitrate reductase alpha subunt, 194 bp upstream of ATG start codon			transversion		Non-coding (#N/A)
3981625	CGGCTATCAC.GTTTCAACTT	G	A	294 bp intergenic region upstream of PTS system glucose-specific transporter subunits IIBC, 151 bp upstream of ATG start codon.			transition		Non-coding
4017768	AGGTTATTTT.ACCTGTATAA	A	G	73 pb intergenic region upstream of DNA damage-inducible protein I (dinL), 39 bp upstream of ATG startr codon			transition		Non-coding (#N/A)
4466849	TAAGATTCGG.GATAACAACA	G	T	intergenic region between artP and arginine transporter substrate-binding protein. tirT has a 20 bp insertion			transition		Non-coding
4479701	GCAGCCACTG.CACCAGCGAC	C	T	350 bp intergenic region upstream of putrescine transporter subunit (potF), 321 bp upstream of ATG start codon			transversion		Non-coding
4524008	TCCAGTACAC.TCCACGCTTT	T	A	352 bp intergenic region upstream of threonine and homoserine efflux system (rhtA), 40 bp upstream of ATG start codon			transversion		Non-coding
4685637	TAAGAACATG.TTTTTCCGAA	T	C	Weird area next to an insertion element. More hypothetical protein annoated in tir A than tir T genome.			transition		Non-coding
5155368	CGGGAAGAAA.TACAATGAAA	T	A	75 bp intergenic region upstream of ecpA (hypotherical protein), 4 bp upstream of ATG start codon			transversion		Non-coding
5258861	AGACTTGTCA.TTTTACAGTT	T	C	64 bp intergenic region between dnaQ and rnhA. 38 bp upstream of rnhA gene and 27 bp upstream of dnaQ gene.			transition		Non-coding
bp1243	GGGATGGGAT.GGTGATAAAA	G	A	2697	1438	S>G	transition	nonsynonymous	peptidase M66 CDS (tagA CDS)	E4U64_28415
bp61643	GAAGGATTTA.CATCTTCTGG	C	T	9510	5663	I>T	transition	nonsynonymous	toxB CDS	E4U64_28765
aThe tir 255 T>A polymorphism.
bLinked polymorphisms on the pO157 plasmid.
